# Supplementary material for: Soluble IL-33 receptor sST2 inhibits colorectal cancer malignant growth by modifying the tumour microenvironment
Source: PubMed Central journal article supplement (PMC5123057; doi:10.1038/ncomms13589), 2016-11-24
Supplement: ncomms13589-s1.pdf [file ncomms13589-s1.pdf]

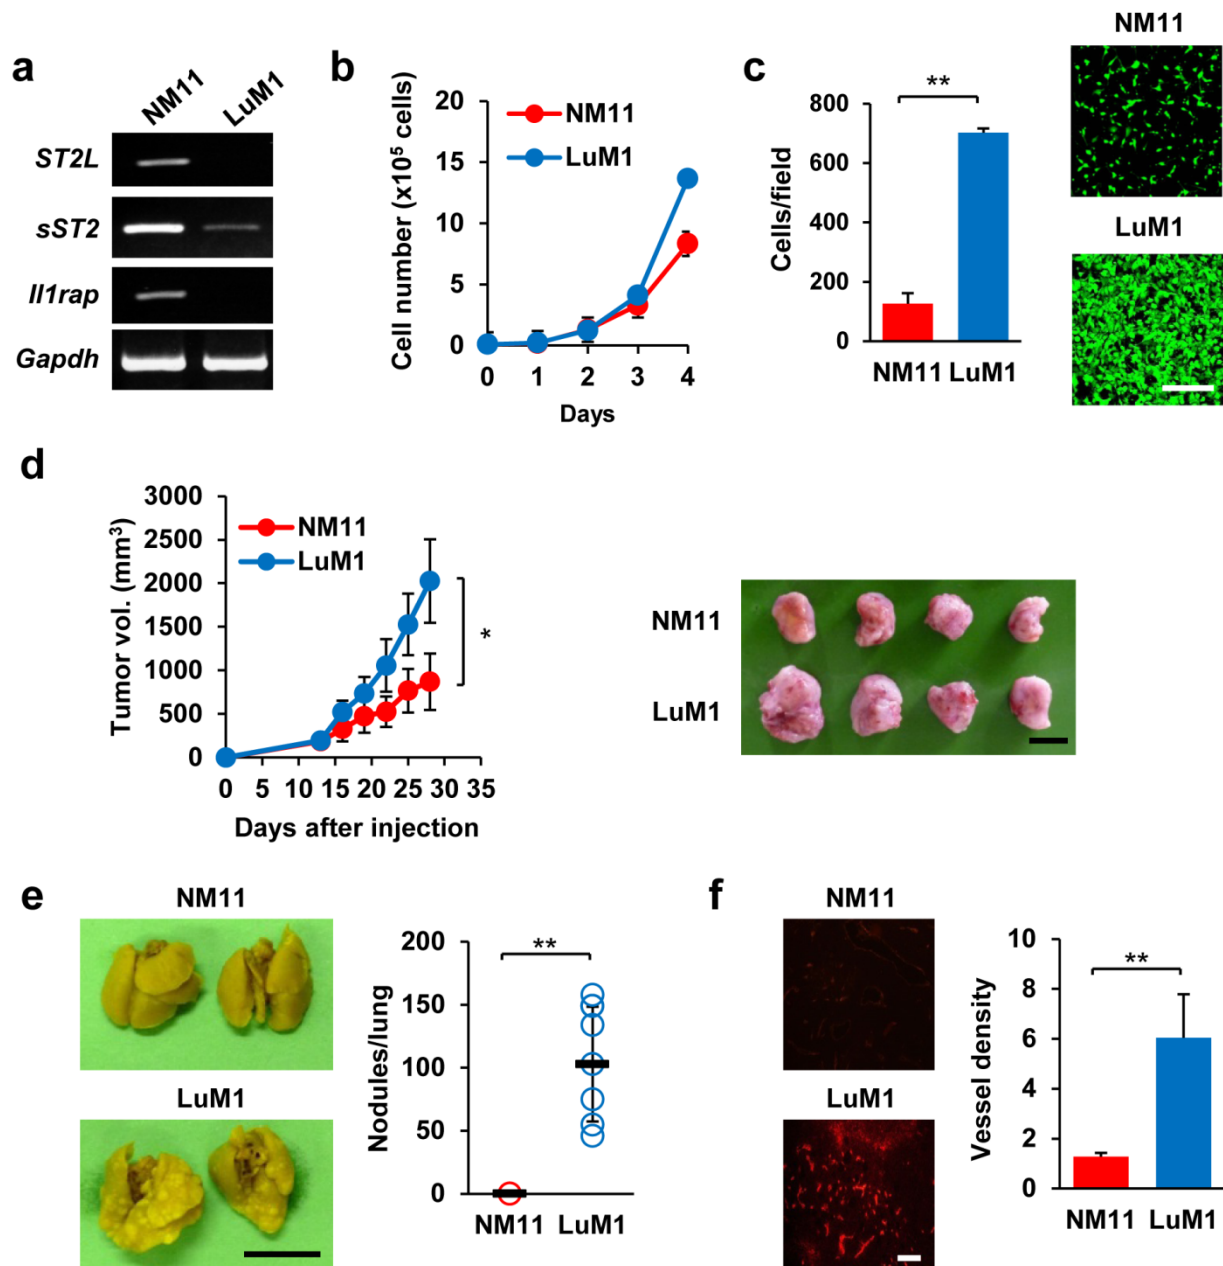

**Supplementary Figure 1. sST2 expression is inversely correlated with the malignant growth of mouse CRC cells.** (a) RT-PCR analysis of IL-33-related mRNA expression in NM11 and LuM1 cells. (b) Cell growth of NM11 and LuM1 cells *in vitro* (n=3). (c) Matrigel invasive ability of NM11 and LuM1 cells. Bar: 200  $\mu$ m. (d) Growth of NM11 and LuM1 tumours in BALB/c mice (n=7 mice per group). Bar: 1 cm. (e) Spontaneous lung metastatic ability of NM11 and LuM1 cells (n=7 mice per group). Bar: 1 cm. (f) Vessel density in NM11 and LuM1 tumours. CD31 staining (left) and vessel density (right) (n=15 fields). Bar: 200  $\mu$ m. The data are shown as the mean  $\pm$  s.d.. \* $P$ <0.01, \*\* $P$ <0.001 by Student's *t*-test.

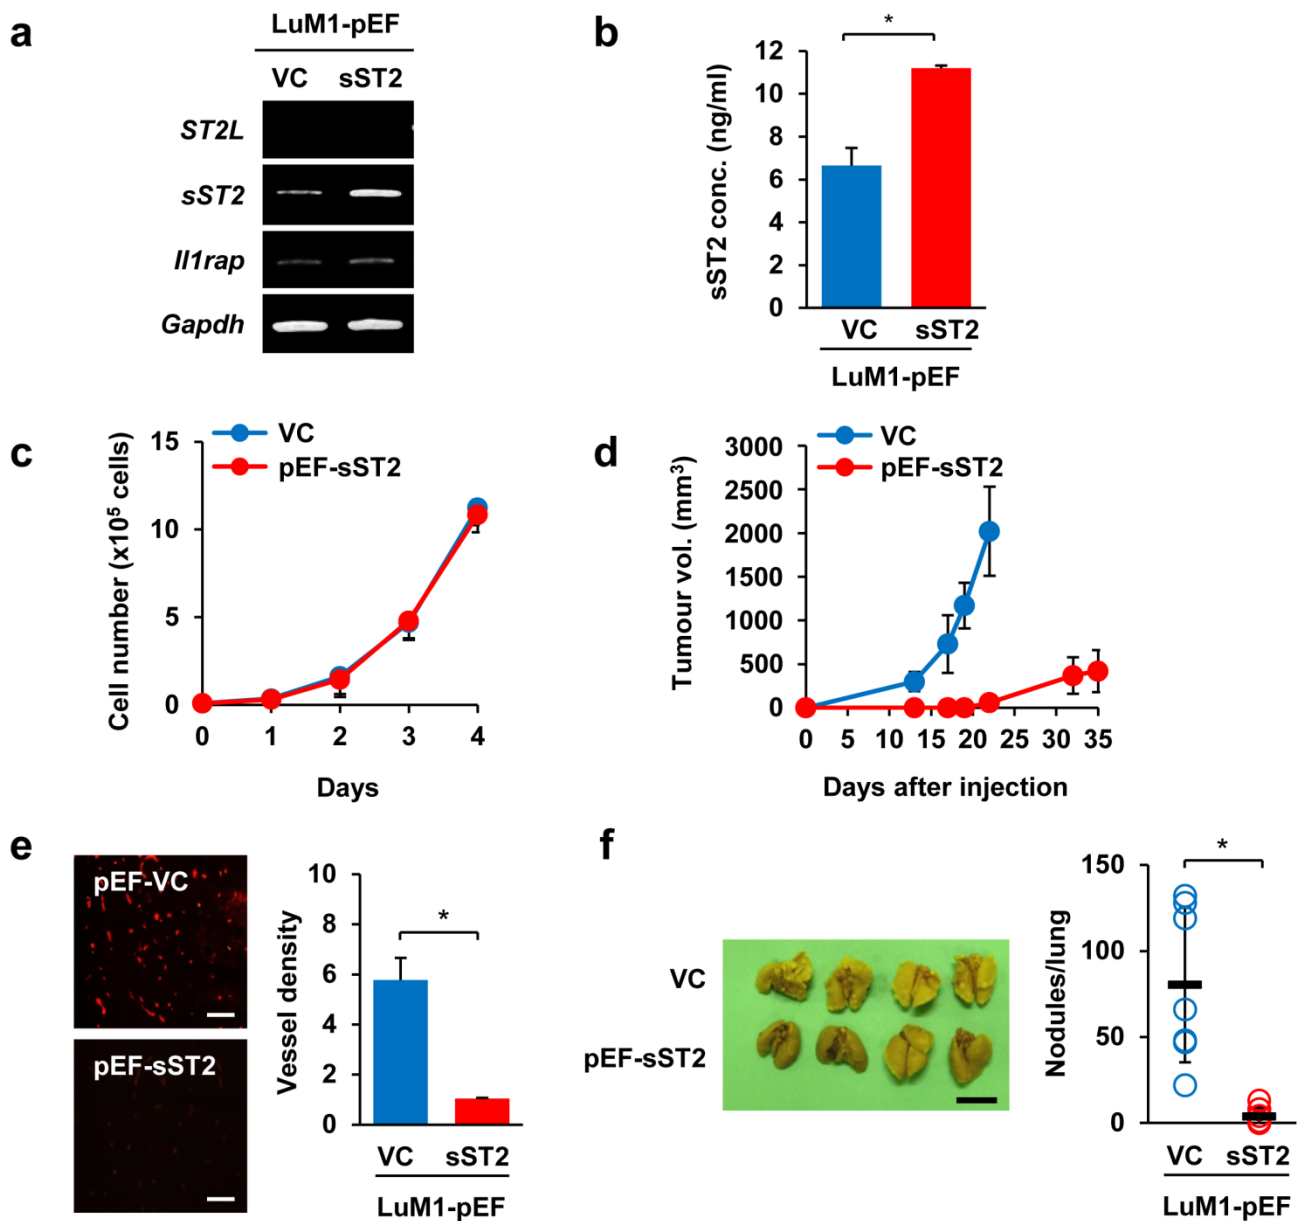

**Supplementary Figure 2. Overexpression of sST2 inhibits the malignant growth of LuM1 cells.** (a) Expression of *ST2L*, *sST2* and *Il1rap* mRNA in LuM1 cells transfected with the pEF plasmid (LuM1-pEF-VC) or with pEF plasmid expressing mouse sST2 (LuM1-pEF-sST2). *Gapdh* served as the loading control. (b) Secretion of sST2 by LuM1-pEF-VC and LuM1-pEF-sST2 cells (n=3). (c) *In vitro* growth of LuM1-pEF-VC and LuM1-pEF-sST2 cells (n=3). (d) Growth of LuM1-pEF-VC and LuM1-pEF-sST2 tumours in BALB/c mice (n=7 mice per group). (e) Vessel density in LuM1-pEF-VC (n=15 fields) and LuM1-pEF-sST2 tumours. CD31 staining (left) and vessel density (right) (n=15 fields). Bar: 200  $\mu$ m. (f) Spontaneous lung metastatic ability of LuM1-pEF-VC and LuM1-pEF-sST2 cells (n=7 mice per group). Bar: 1 cm. The data are shown as the mean  $\pm$  s.d. \*  $P < 0.001$  by Student's *t*-test.

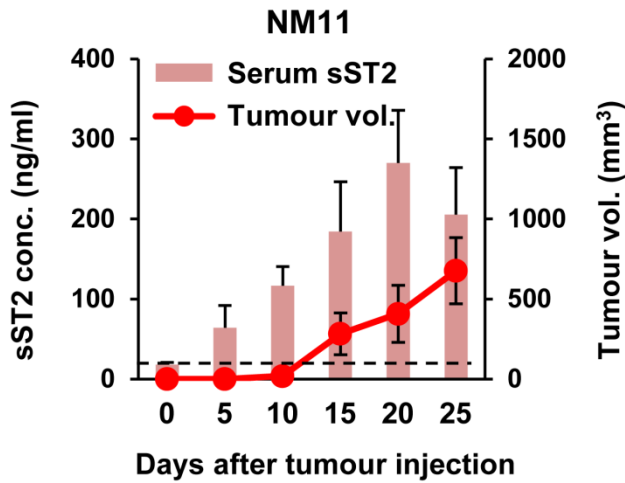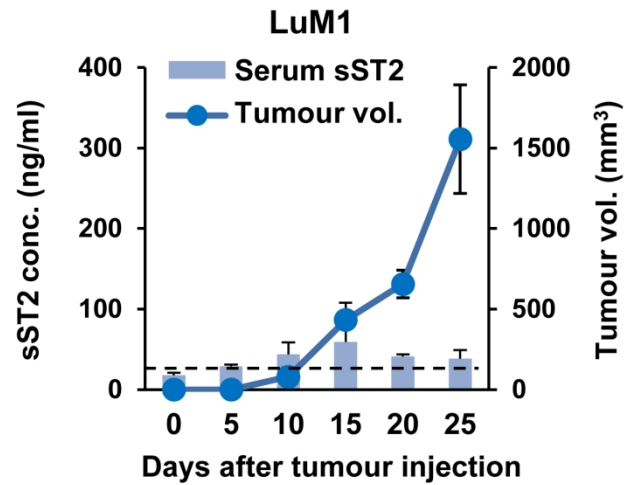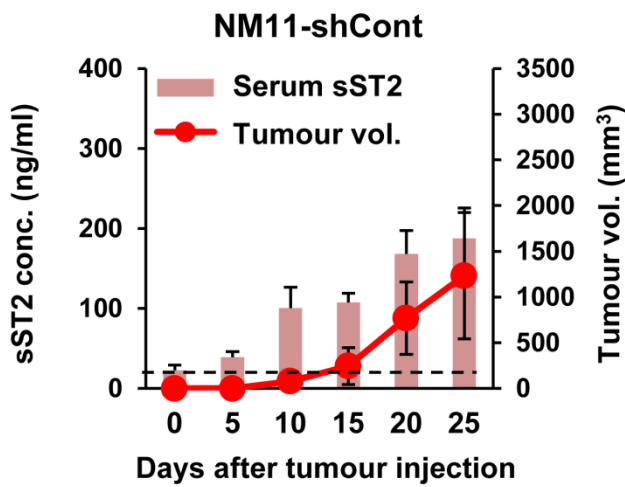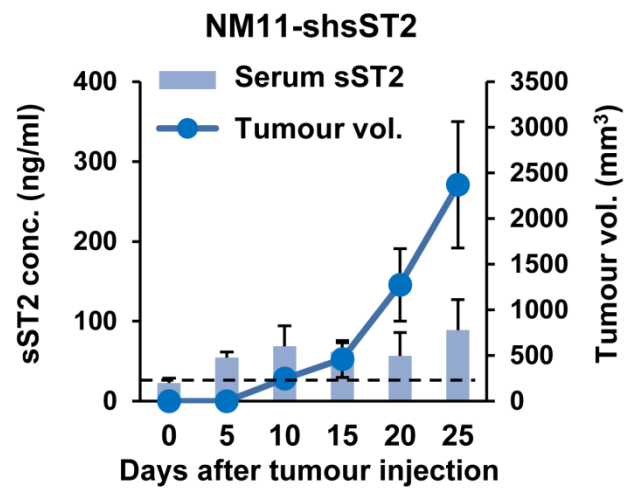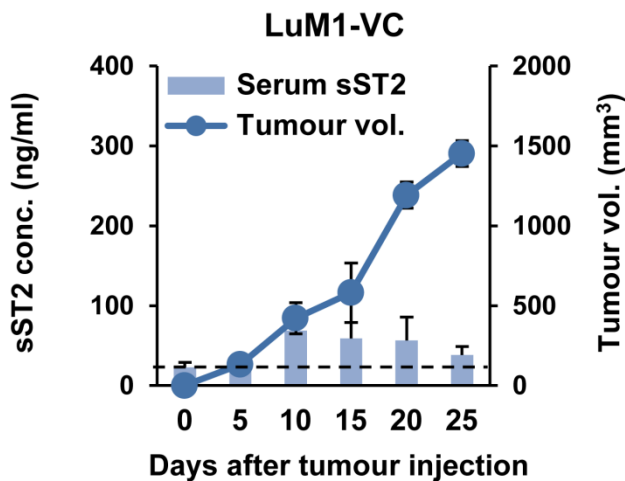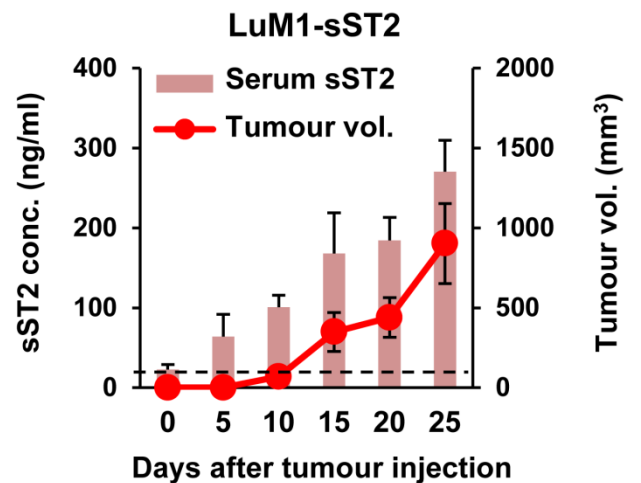

**Supplementary Figure 3. sST2 serum concentrations in tumour-bearing mice.** Cells ( $3 \times 10^5$  cells) were inoculated subcutaneously into 6-week-old female BALB/c mice ( $n=6$  mice per group). The tumour sizes were measured and serum samples were collected every 5 days. sST2 serum concentrations were determined by ELISA. The dashed lines indicate the mean value of the sST2 serum concentration (17.9 ng/ml) in non-tumour-bearing age-matched BALB/c mice ( $n=5$  mice per group). The data are shown as the mean  $\pm$  s.d..

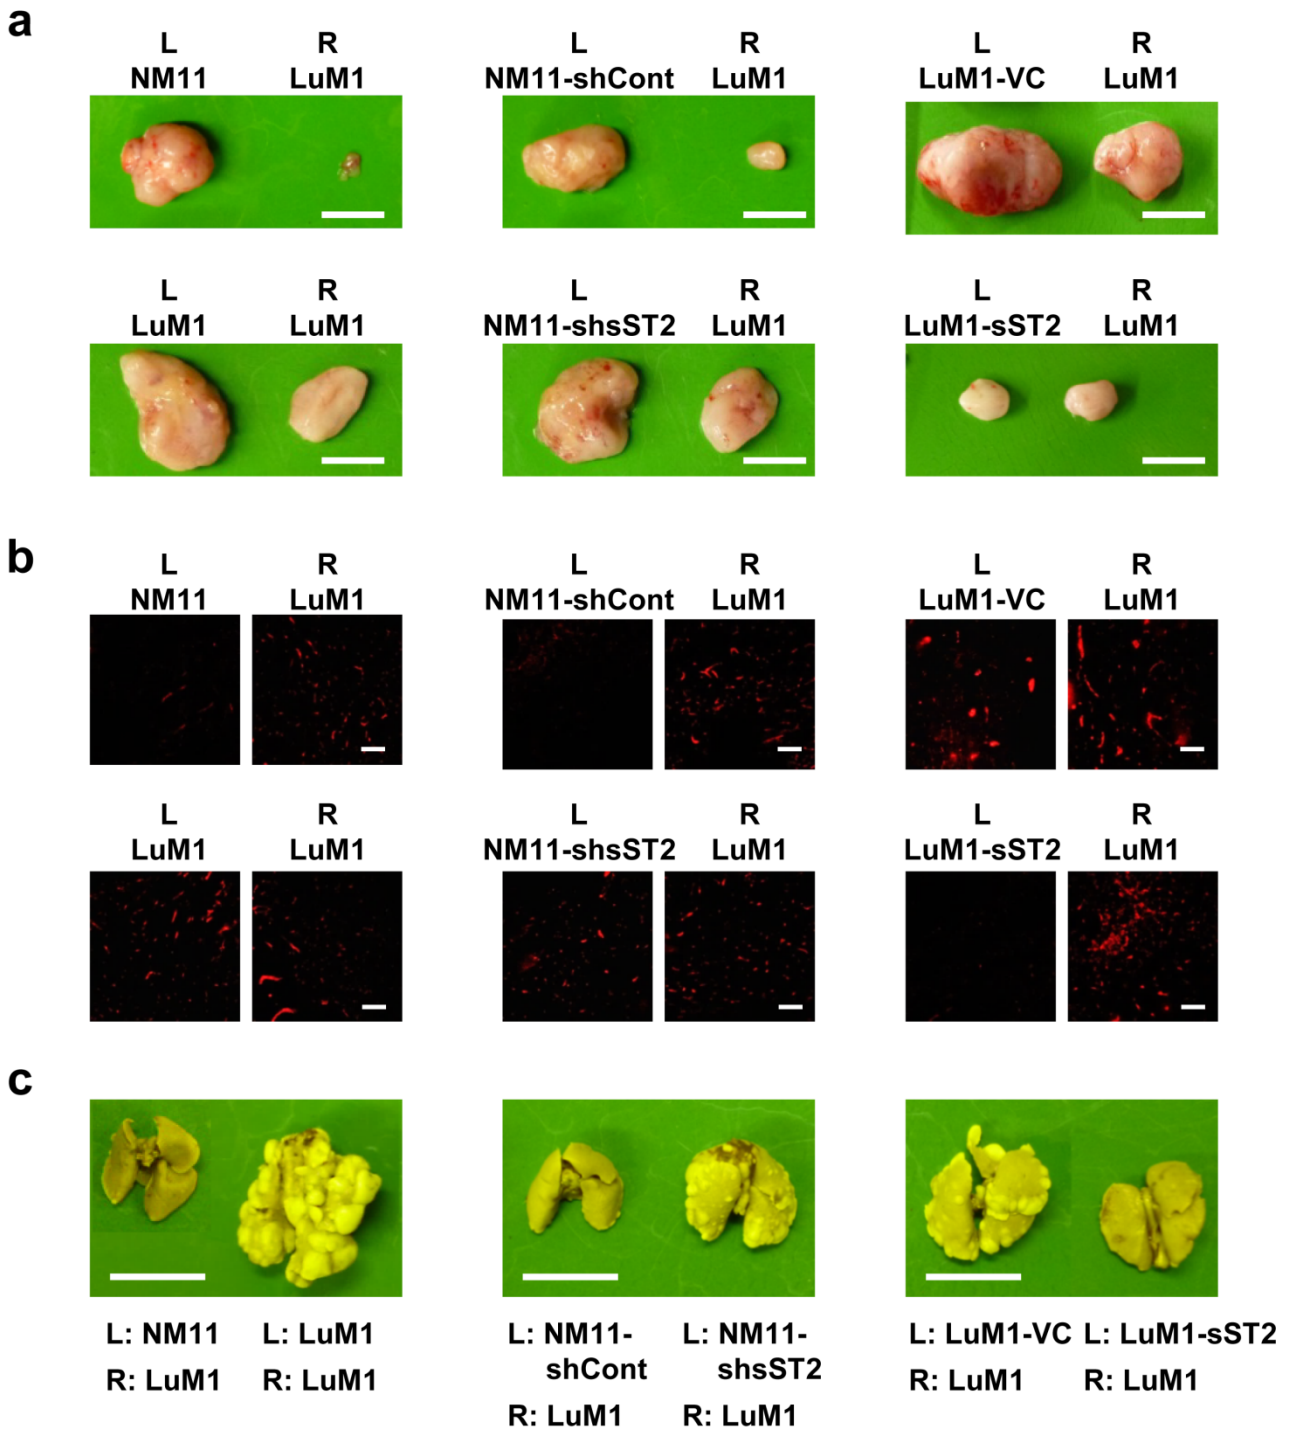

**Supplementary Figure 4. Circulating sST2 suppresses the malignant growth of distant LuM1 tumours.** BALB/c mice were subcutaneously inoculated with sST2 high-expressing (NM11-shCont and LuM1-sST2) or low-expressing cells (LuM1-VC and NM11-shsST2) into the left flank (L) on Day 0, followed by the injection of LuM1 cells into the right flank (R) on Day 5. The mice were euthanized on Day 30, and the tumours and lungs were collected. **(a)** Tumour growth. Bars, 1 cm. **(b)** Angiogenesis. CD31 staining of the cryostat sections of tumours is shown. Bars, 200  $\mu$ m. **(c)** Lung metastases. Bars, 1 cm.

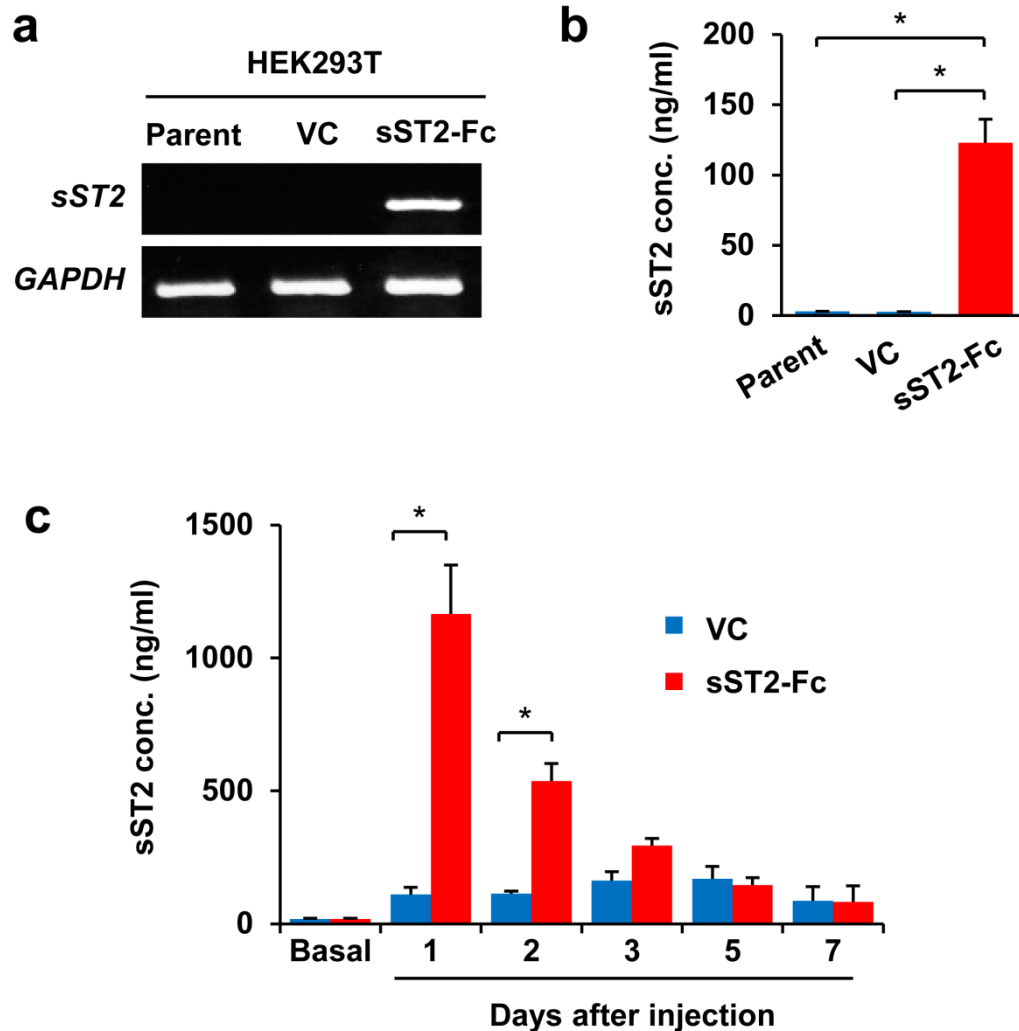

**Supplementary Figure 5. Expression of the sST2-Fc fusion protein in HEK293T cells and BALB/c mice hydrodynamically transfected with the expression vector.** (a) RT-PCR analysis of *sST2-Fc* mRNA in parental HEK293T cells, cells transfected with pcDNA3.1 (VC) and cells transfected with the pcDNA3.1/sST2-Fc expression vector (sST2-Fc). (b) Secretion of the sST2-Fc fusion proteins into culture supernatants by parental HEK293T cells, cells transfected with pcDNA3.1 (VC) and cells transfected with the pcDNA3.1/sST2-Fc expression vector (sST2-Fc). The conditioned media were collected 2 days after transfection, and the concentrations of the sST2-Fc fusion proteins were measured (n=3). (c) Production of sST2-Fc fusion proteins in BALB/c mice hydrodynamically injected with pcDNA3.1 alone (VC) and the pcDNA3.1/sST2-Fc expression vector (sST2-Fc). On Days 1, 2, 3, 5 and 7 after injection (n=5 mice per group), sST2 serum concentrations were measured by ELISA. The data are shown as the mean  $\pm$  s.d.. \*  $P < 0.01$  by Student's *t*-test.

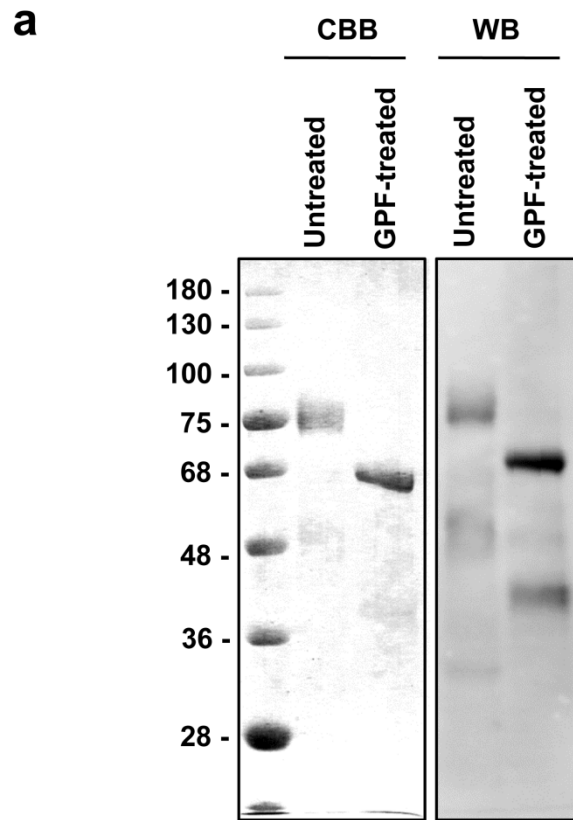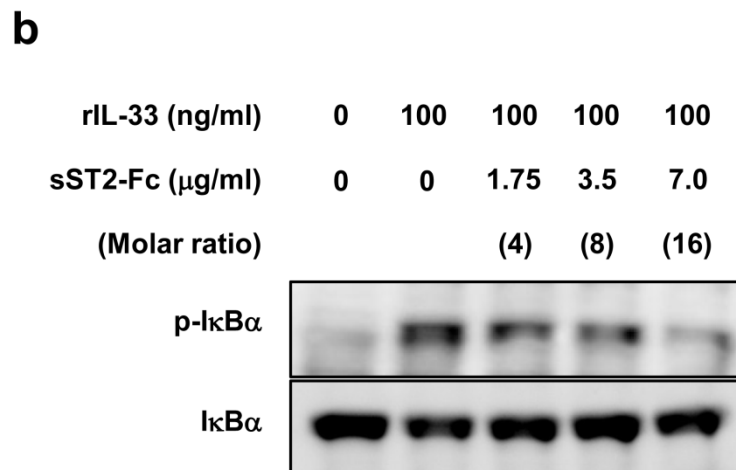

**Supplementary Figure 6. Preparation of sST2-Fc fusion protein.** (a) Preparation of sST2-Fc fusion protein. sST2-Fc protein released into the medium by ExpiCHO-S cells transfected with the sST2-Fc expression plasmid (pcDNA3.1-sST2-Fc) was isolated using an nProtein A Sepharose column. The purity of the sST2-Fc fusion protein was evaluated by SDS-PAGE followed by Coomassie brilliant blue (CBB) staining and Western blotting (WB) using anti-ST2 antibody. Glycosylation of the fusion protein was confirmed after treatment with glycopeptidase F (GPF). (b) Biological activity of the sST2-Fc protein. Biological activity was evaluated by the suppression of I $\kappa$ B $\alpha$  phosphorylation induced by mouse IL-33 (100 ng/ml) in P29 cells.

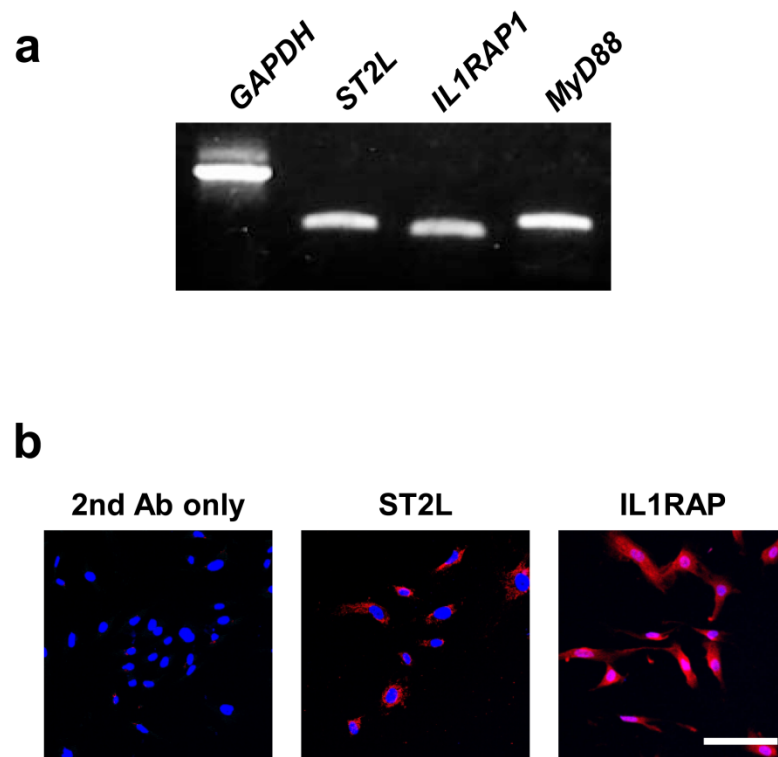

**Supplementary Figure 7. Expression of ST2L, IL-1RAP and MyD88 in HUVECs.** (a) RT-PCR analysis of *ST2L*, *IL1RAP* and *MyD88* mRNA expression. (b) Immunofluorescent staining of ST2L and IL-1RAP. Bar: 50  $\mu\text{m}$ .

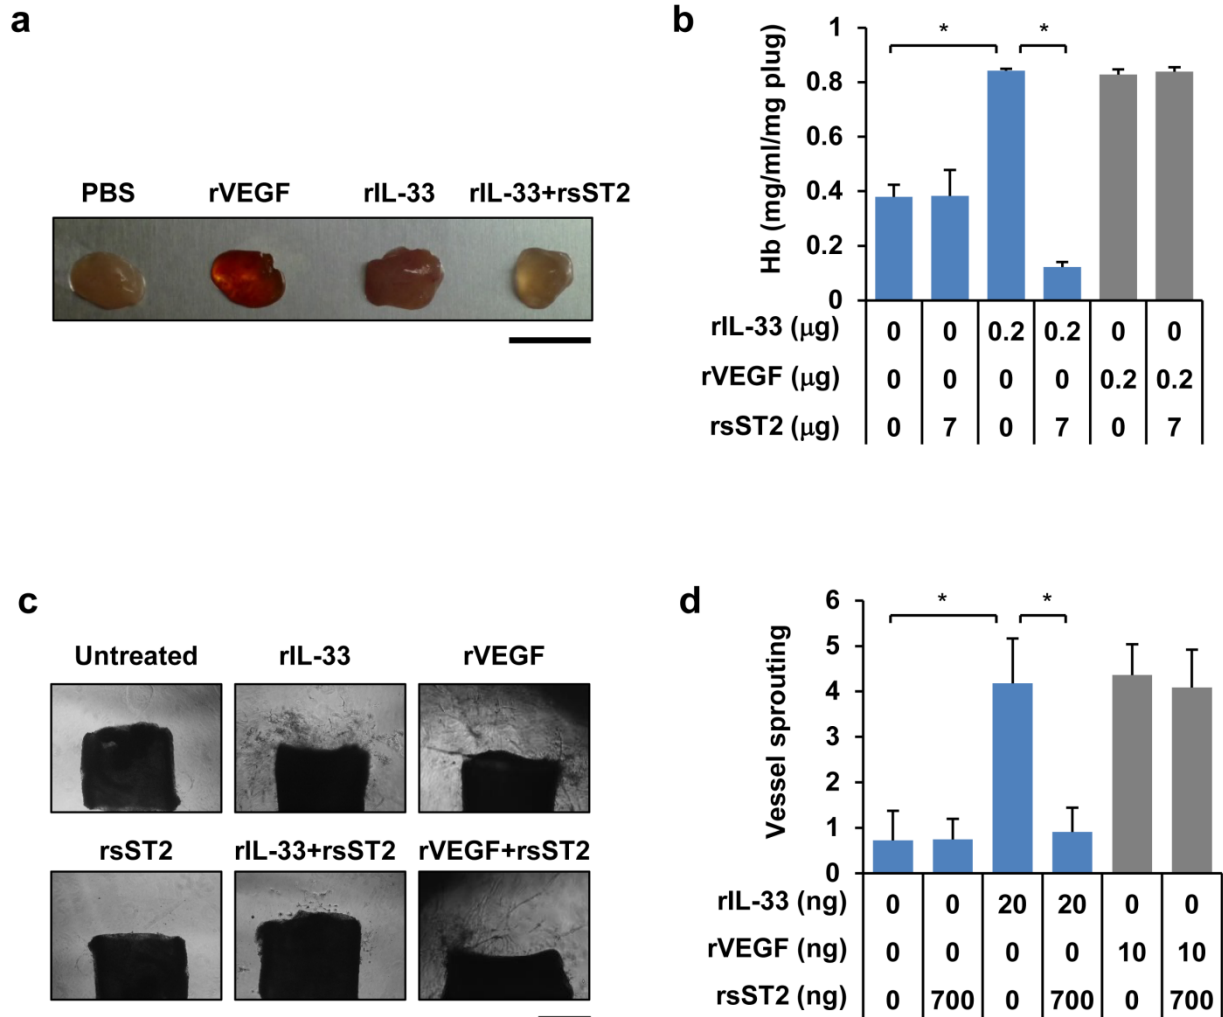

**Supplementary Figure 8. Effect of sST2 on IL-33-induced angiogenesis in the Matrigel plug assay and the aortic ring assay.** (a, b) Matrigel plug assay. Six-week-old BALB/c mice ( $n=3$  mice per group) were injected subcutaneously with 0.5 ml Matrigel containing the indicated amount of rIL-33 with or without rsST2. After 6 days, the plugs were homogenized in PBS, and the total haemoglobin concentrations were measured by the Drabkin method. Bar: 1 cm. (c, d) Aortic ring sprouting assay. Aortic rings on Matrigel were incubated with 20 ng/ml rIL-33 protein with or without 700 ng/ml rsST2-Fc for 2 weeks. The angiogenic sprouting from aortic rings ( $n=4$ ) was photographed, and the sprouting was quantified by counting the number of vascular sprouts that directly originated from the aorta. Bar: 500  $\mu\text{m}$ . The data are shown as the mean  $\pm$  s.d.. \* $P<0.001$  by Student's  $t$ -test.



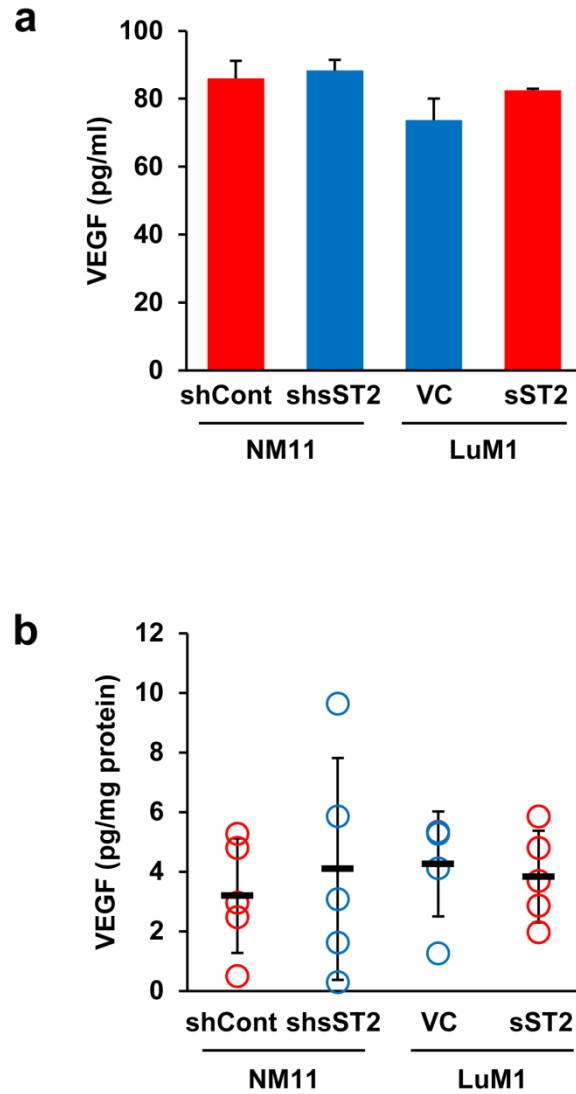

**Supplementary Figure 9. VEGF production by cells and VEGF concentrations in the tumours. (a)** VEGF production by NM11-shCont, NM11-shsST2, LuM1-VC and LuM1-sST2 cells. The cells were cultured for 2 days, and VEGF concentrations in the conditioned media were measured by ELISA (n=3). **(b)** VEGF concentrations in the tumours. VEGF concentrations in the tumour lysates established by NM11-shCont, NM11-shsST2, LuM1-VC and LuM1-sST2 cells were measured by ELISA (n=5). The data are shown as the mean  $\pm$  s.d..

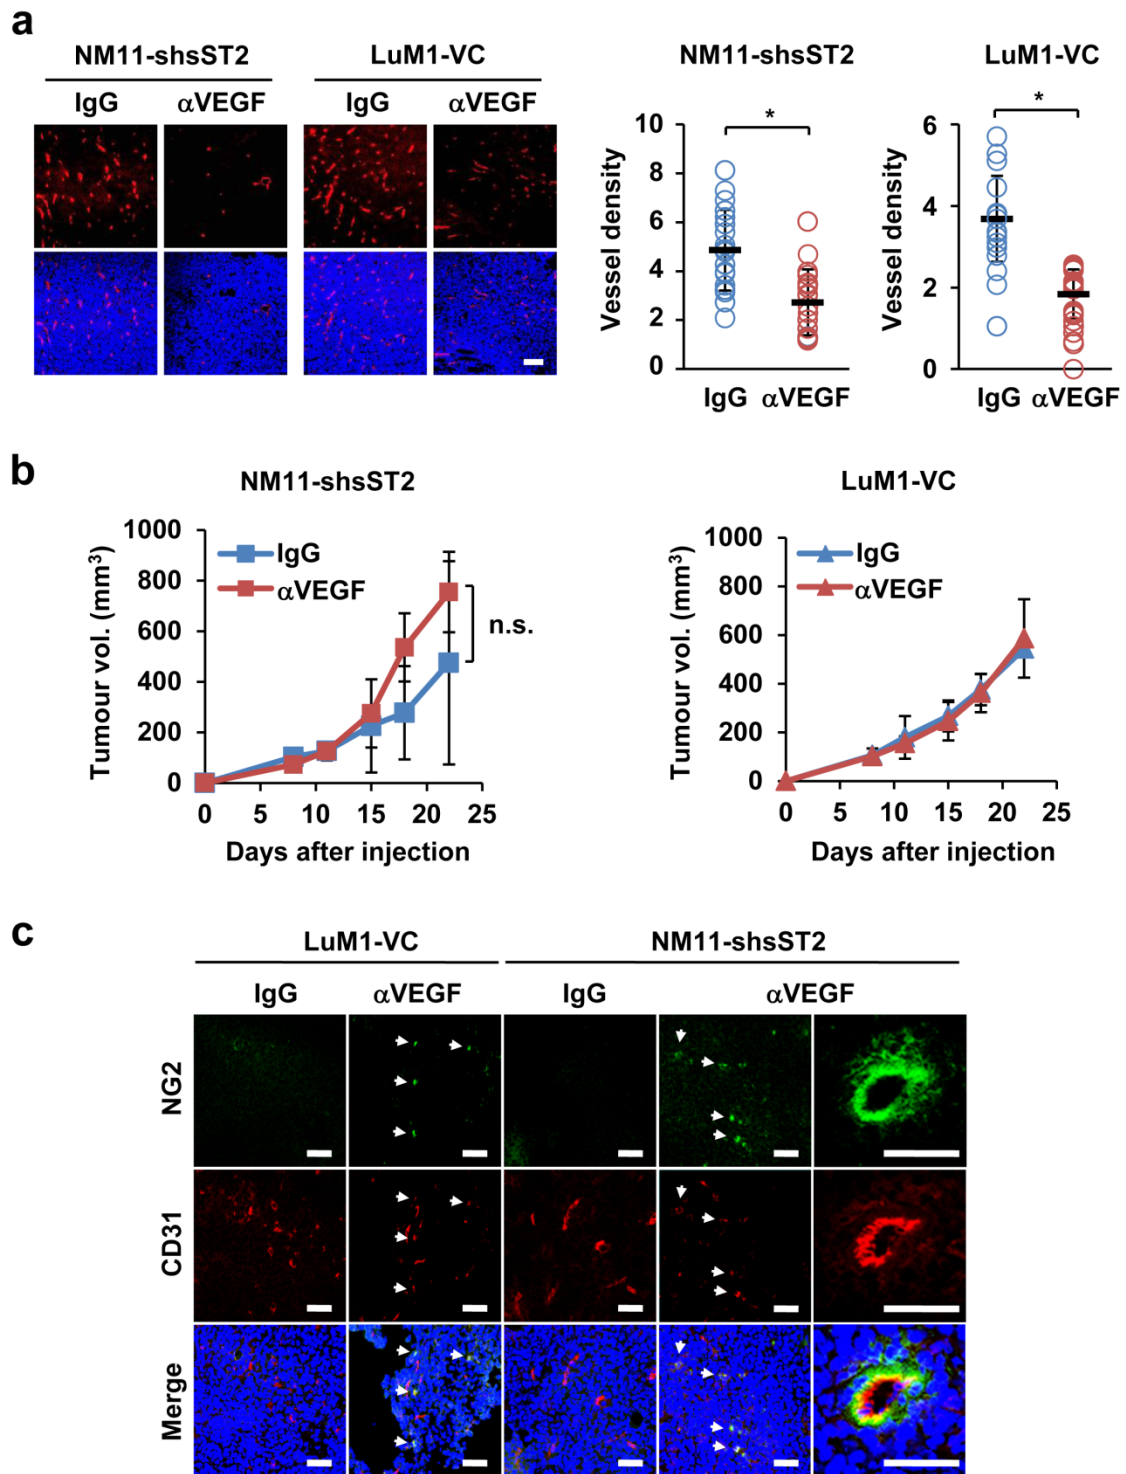

**Supplementary Figure 10. Effect of anti-VEGF treatment on the angiogenesis and tumour growth of CRC cells.** Balb/c female mice were subcutaneously injected with NM11-shsST2 and LuM1-VC cells (n=4 per group). The mice were intraperitoneally administered twice a week (total 7 times) with isotype-matched IgG (100  $\mu$ g/mouse) or monoclonal anti-VEGF antibody (100  $\mu$ g/mouse) starting on day 1 post-injection of tumour cells. **(a)** Tumour angiogenesis. Left: CD31 staining. Right: vessel density. NM11-shsST2 tumours (n=29 fields), LuM1-VC tumours (n=30 fields). Bar: 100  $\mu$ m. **(b)** Tumour growth. **(c)** Pericyte coverage of microvessels. Cryosections of the tumours were immunostained with anti-CD31 and anti-NG2 antibodies. The sections were counterstained with DAPI. The arrows indicate vessels with pericytes. Bars, 100  $\mu$ m. The data are shown as the mean  $\pm$  s.d.. n.s., not significant. \* $P$ <0.001 by Student's  $t$ -test.

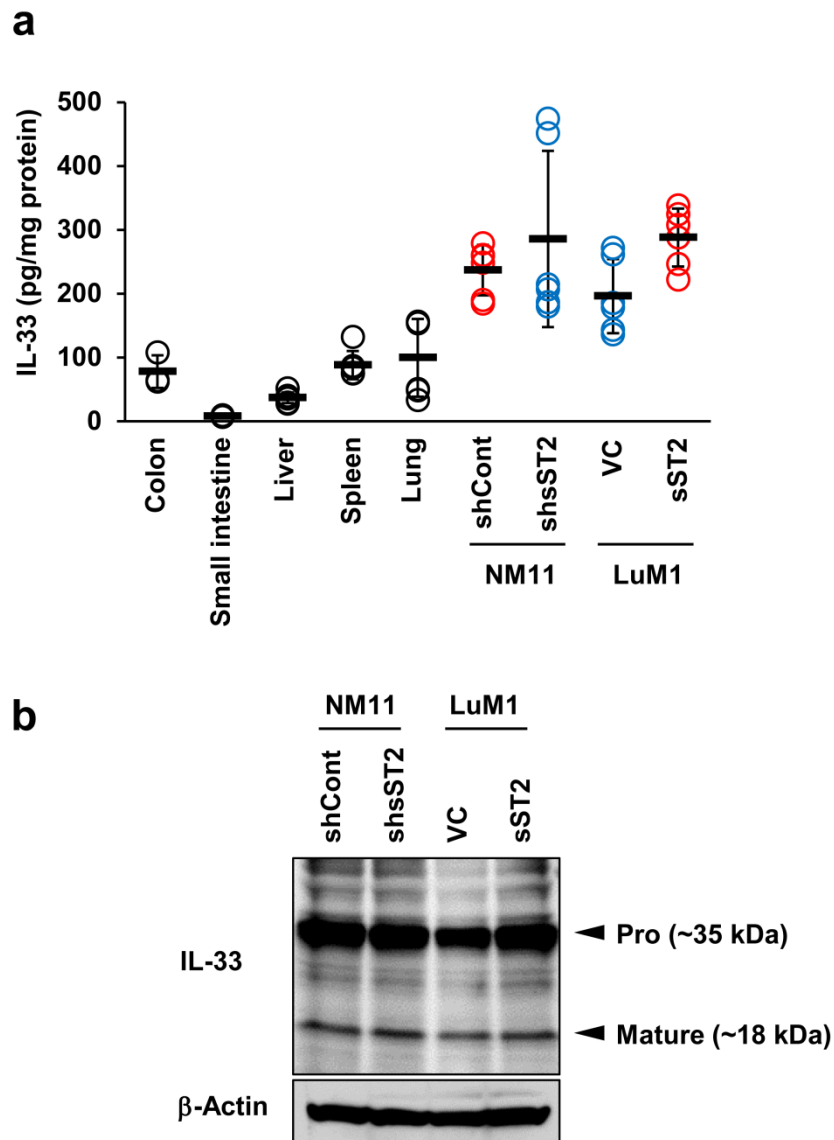

**Supplementary Figure 11. IL-33 concentrations and processing in tumour tissues.** (a) IL-33 concentrations in the tumours. IL-33 concentrations in the lysates of normal tissues (colon, small intestine, liver, spleen and lung) (n=5) and in tumour lysates (n=5) established by NM11-shCont, NM11-shsST2, LuM1-VC and LuM1-sST2 cells were measured by ELISA. (b) Processing of IL-33 in the tumours. IL-33 in the lysates of NM11-shCont, NM11-shsST2, LuM1-VC and LuM1-sST2 tumours was detected by SDS-PAGE followed by Western blotting with an anti-IL-33 antibody.  $\beta$ -Actin served as the loading control.

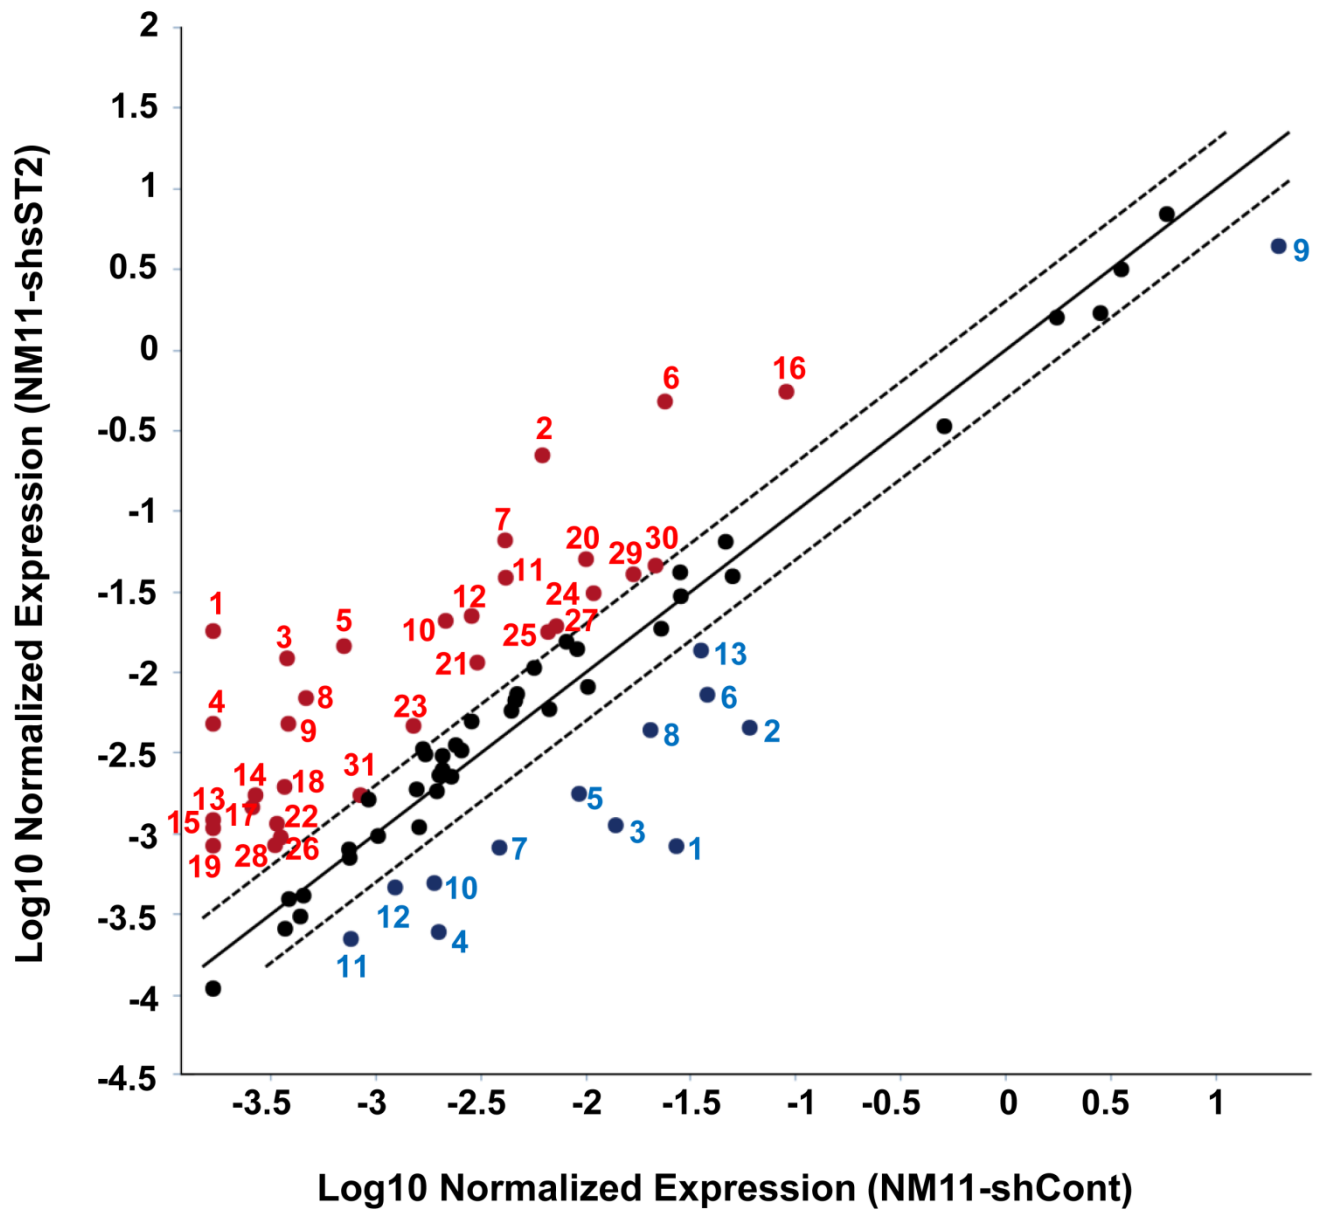

Supplementary Figure 12. Differential gene expression of chemokines and cytokines in sST2-knockdown NM11 cells. Profiling of cytokine and chemokine genes. Chemokine and cytokine genes differentially expressed in NM11-shsST2 versus NM11-shCont cells were profiled by a Mouse Cytokines & Chemokines RT<sup>2</sup> Profiler PCR Array. The numbers correspond to those in Supplementary Table 1.

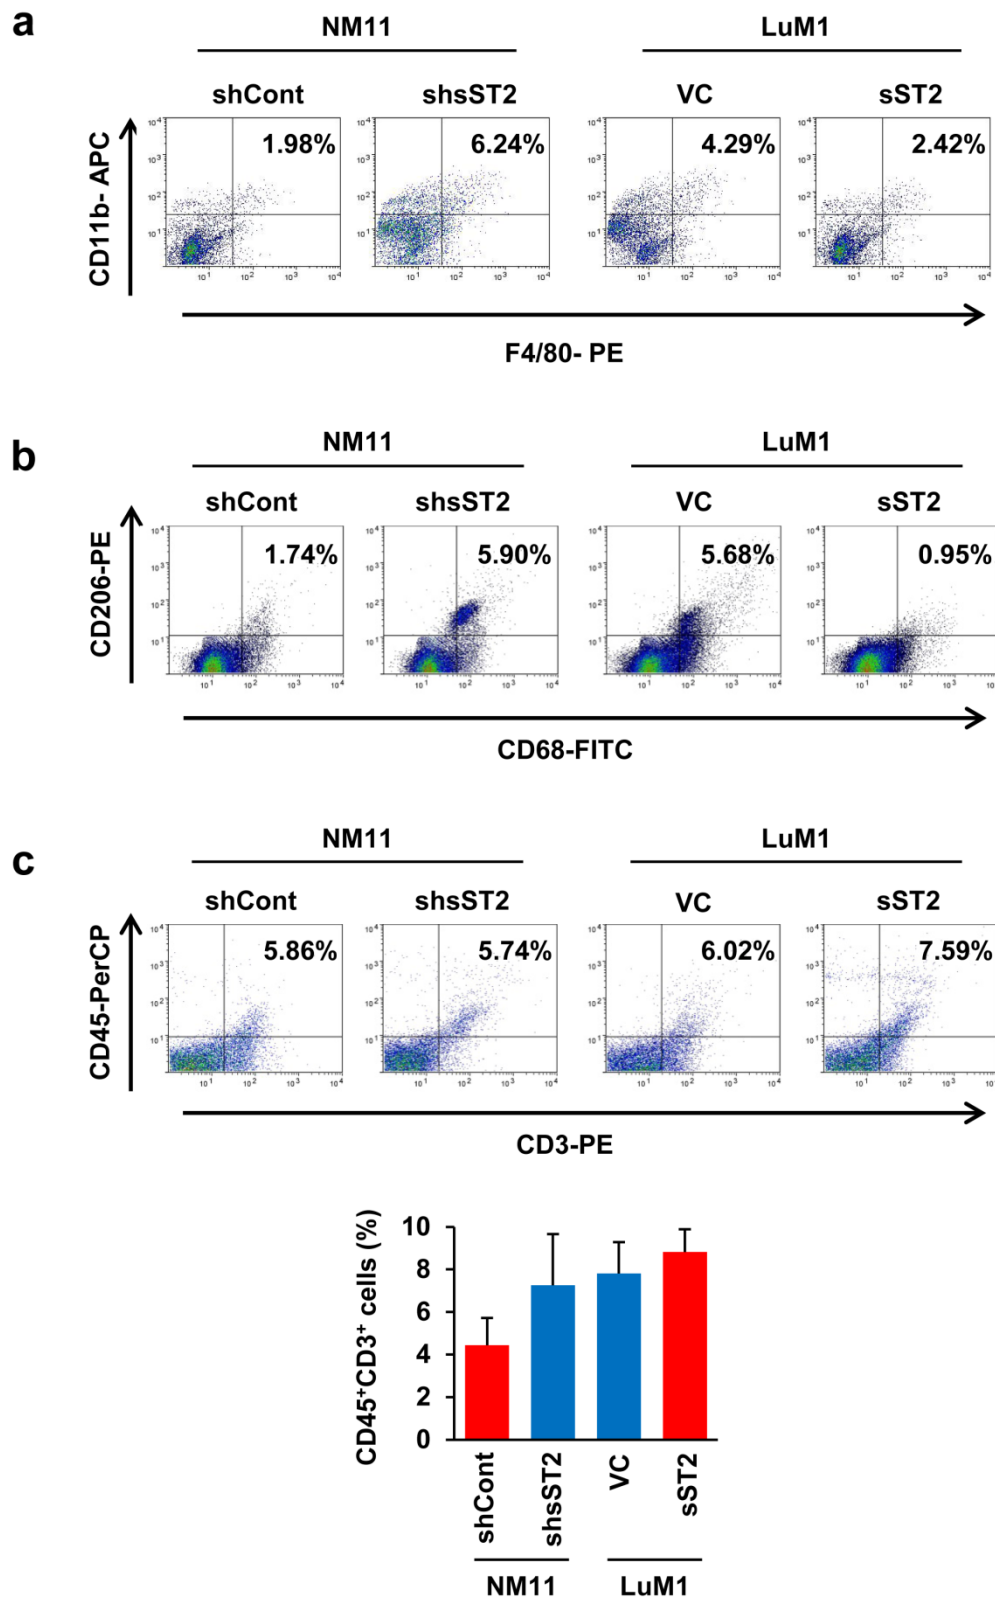

**Supplementary Figure 13. FACS analysis of macrophage infiltration and polarization and CD45<sup>+</sup>CD3<sup>+</sup> lymphoid cells in tumours.** (a) Macrophage infiltration. Cells in tumours established by NM11-shCont, NM11-shsST2, LuM1-VC and LuM1-sST2 cells were immunostained with anti-F4/80-PE and anti-CD11b-APC and analysed by FACS. (b) Macrophage polarization of the M2a subset. Macrophages in the tumours (CD68<sup>+</sup>CD206<sup>+</sup>) were analysed by FACS. (c) CD45<sup>+</sup>CD3<sup>+</sup> lymphoid cells in the tumours. CD45<sup>+</sup>CD3<sup>+</sup> lymphoid cells were analysed by FACS (n=3).

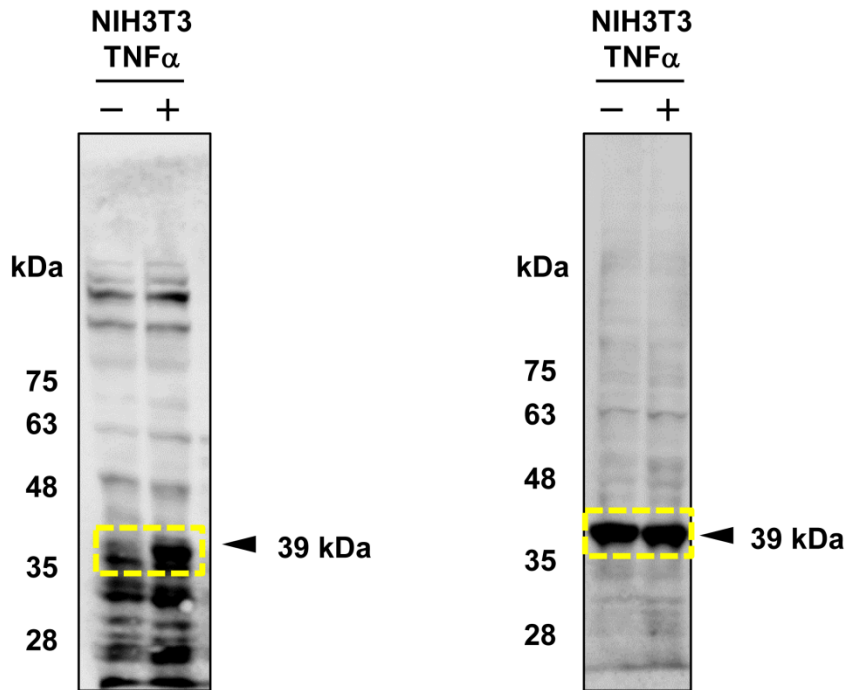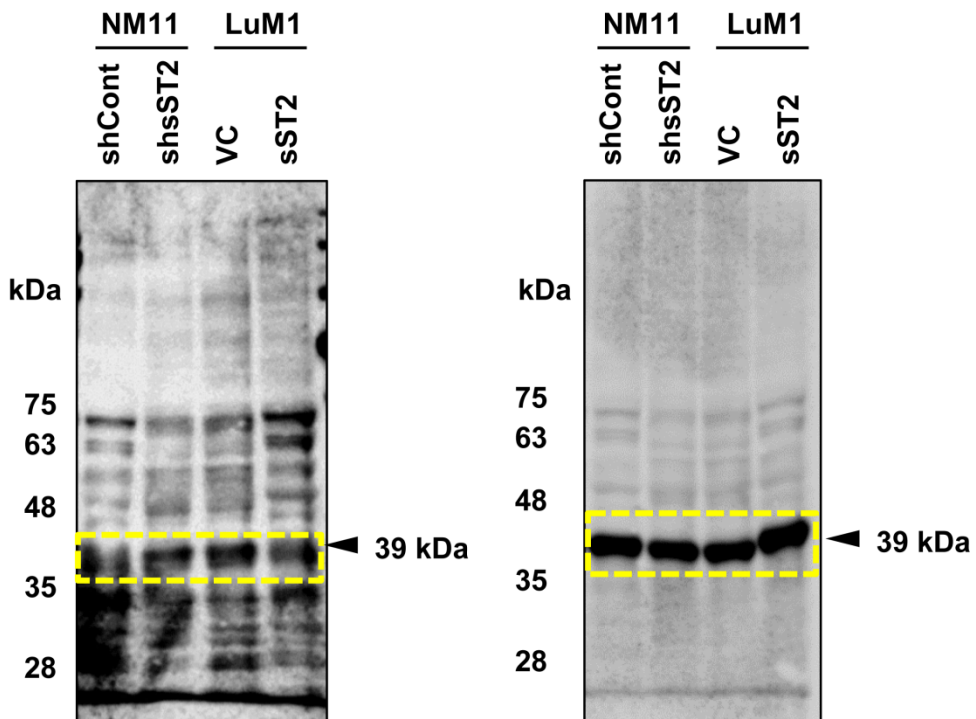

**Supplementary Figure 14.** Full-size images of Western blots. The yellow dotted line indicates the cropped region included in Figure 6a.

Supplementary Table 1. Differential gene expression of chemokines and cytokines in sST2-knockdown NM11 cells.

| Up-regulated |                |             |             |               | Down-regulated |                  |             |             |               |
|--------------|----------------|-------------|-------------|---------------|----------------|------------------|-------------|-------------|---------------|
| No.          | Symbol         | NM11-shsST2 | NM11-shCont | shsST2/shCont | No.            | Symbol           | NM11-shsST2 | NM11-shCont | shsST2/shCont |
| 1            | <i>Il17f*</i>  | 0.017886    | 0.000166    | 107.75        | 1              | <i>Tnfrsf11b</i> | 0.00083     | 0.026784    | 0.03          |
| 2            | <i>Ccl7</i>    | 0.219912    | 0.006162    | 35.69         | 2              | <i>Cxcl13</i>    | 0.004503    | 0.059850    | 0.08          |
| 3            | <i>Il13</i>    | 0.012132    | 0.000375    | 32.35         | 3              | <i>Il7</i>       | 0.001118    | 0.013768    | 0.08          |
| 4            | <i>Il4</i>     | 0.004759    | 0.000166    | 28.67         | 4              | <i>Ccl20</i>     | 0.000243    | 0.001977    | 0.12          |
| 5            | <i>Cxcl3</i>   | 0.014428    | 0.000699    | 20.64         | 5              | <i>Il11*</i>     | 0.001754    | 0.009211    | 0.19          |
| 6            | <i>Ccl12</i>   | 0.474671    | 0.023642    | 20.08         | 6              | <i>Cxcl12</i>    | 0.007214    | 0.037616    | 0.19          |
| 7            | <i>Cxcl10</i>  | 0.06538     | 0.004093    | 15.97         | 7              | <i>Ccl19*</i>    | 0.000813    | 0.003846    | 0.21          |
| 8            | <i>Cxcl9</i>   | 0.006872    | 0.000461    | 14.91         | 8              | <i>Bmp4</i>      | 0.004349    | 0.020158    | 0.22          |
| 9            | <i>Ppbp</i>    | 0.004759    | 0.00038     | 12.52         | 9              | <i>Spp1</i>      | 4.362031    | 19.800981   | 0.22          |
| 10           | <i>Tnfsf11</i> | 0.020689    | 0.002134    | 9.70          | 10             | <i>Il16</i>      | 0.00049     | 0.001883    | 0.26          |
| 11           | <i>Il1rn*</i>  | 0.03834     | 0.004122    | 9.30          | 11             | <i>Il12a*</i>    | 0.000221    | 0.000754    | 0.29          |
| 12           | <i>Cxcl5</i>   | 0.022174    | 0.002835    | 7.82          | 12             | <i>Lta</i>       | 0.00046     | 0.001225    | 0.38          |
| 13           | <i>Nodal</i>   | 0.001206    | 0.000166    | 7.27          | 13             | <i>Ltb</i>       | 0.013555    | 0.035097    | 0.39          |
| 14           | <i>Tgfb2</i>   | 0.001718    | 0.000265    | 6.48          |                |                  |             |             |               |
| 15           | <i>Fasl</i>    | 0.001072    | 0.000166    | 6.46          |                |                  |             |             |               |
| 16           | <i>Ccl2</i>    | 0.545254    | 0.089467    | 6.10          |                |                  |             |             |               |
| 17           | <i>Bmp7</i>    | 0.001445    | 0.000256    | 5.64          |                |                  |             |             |               |
| 18           | <i>Il12b*</i>  | 0.001933    | 0.000364    | 5.31          |                |                  |             |             |               |
| 19           | <i>Ifng*</i>   | 0.000836    | 0.000166    | 5.04          |                |                  |             |             |               |
| 20           | <i>Csf1</i>    | 0.049894    | 0.00994     | 5.02          |                |                  |             |             |               |
| 21           | <i>Cxcl1</i>   | 0.011399    | 0.003017    | 3.78          |                |                  |             |             |               |
| 22           | <i>Cxcl11*</i> | 0.001141    | 0.000335    | 3.41          |                |                  |             |             |               |
| 23           | <i>Xcl1</i>    | 0.004629    | 0.001498    | 3.10          |                |                  |             |             |               |
| 24           | <i>Il1b*</i>   | 0.030713    | 0.010802    | 2.84          |                |                  |             |             |               |
| 25           | <i>Ccl3</i>    | 0.00094     | 0.000349    | 2.70          |                |                  |             |             |               |
| 26           | <i>Ccl1</i>    | 0.01764     | 0.006558    | 2.69          |                |                  |             |             |               |
| 27           | <i>Il18</i>    | 0.01917     | 0.007177    | 2.67          |                |                  |             |             |               |
| 28           | <i>Il10*</i>   | 0.000841    | 0.000328    | 2.56          |                |                  |             |             |               |
| 29           | <i>Ccl4</i>    | 0.040246    | 0.016717    | 2.41          |                |                  |             |             |               |
| 30           | <i>Ccl5*</i>   | 0.045594    | 0.021307    | 2.14          |                |                  |             |             |               |
| 31           | <i>Tnf</i>     | 0.001718    | 0.000837    | 2.05          |                |                  |             |             |               |

Upregulated and downregulated genes in NM11-shsST2 cells. Direct NF- $\kappa$ B target genes are marked with asterisks. See Supplementary Figure 12.

**Supplementary Table 2. Antibodies used for IHC, IF and FCM analyses.**

| Antibodies                                        | Clone     | Label        | Supplier Catalogue #       | Application                       | Dilutions Conc.              |
|---------------------------------------------------|-----------|--------------|----------------------------|-----------------------------------|------------------------------|
| LEAF™ Purified Rat IgG2a, κ Isotype Ctrl Antibody | RTK2758   | -            | BioLegend 400502           | Neutralization (control antibody) | -                            |
| LEAF™ Purified anti-mouse VEGF-A Antibody         | 2G11-2A05 | -            | BioLegend 512808           | Neutralization                    | -                            |
| Rabbit anti-human IL1RL1                          | -         | -            | Atlas Antibodies HPA007406 | IHC                               | 1:500                        |
| Mouse anti-human CD31                             | JC70A     | -            | DAKO IS610                 | IHC                               | 1:100                        |
| Rabbit anti-NG2                                   | -         | -            | Cell Signaling #4235       | IF                                | 1:100                        |
| Rat anti-mouse CD31                               | MEC 13.3  | -            | BD Biosciences 553370      | IF                                | 1:100                        |
| Rat anti-mouse F4/80                              | A3-1      | -            | Bio-Rad MCA497G            | IF                                | 1:100                        |
| Goat anti-mouse ST2/IL-1R4                        | -         | -            | R&D Systems AF1004         | IF                                | 1:200                        |
| Mouse anti-human ST2                              | HB12      | -            | MBL D065-3                 | IF                                | 1:200                        |
| Rabbit anti-IL1RAP                                | -         | -            | Abcam Ab8110               | IF                                | 1:150                        |
| Rat anti-mouse CD16/32                            | 93        | -            | BioLegend 101301           | FCM                               | 1 µg/2x10 <sup>6</sup> cells |
| Rat anti-mouse CD45                               | 30-F11    | PerCP /Cy5.5 | BD Biosciences 561869      | FCM                               | 1 µg/2x10 <sup>6</sup> cells |
| Hamster anti-mouse CD3e                           | 145-2C11  | PE           | BD Biosciences 561824      | FCM                               | 1 µg/2x10 <sup>6</sup> cells |
| Rat anti-mouse F4/80                              | A3-1      | PE           | BioLegend 122615           | FCM                               | 1 µg/2x10 <sup>6</sup> cells |
| Rat anti-mouse CD11b                              | M1/70     | APC          | BD Biosciences 561690      | FCM                               | 1 µg/2x10 <sup>6</sup> cells |
| Rat anti-mouse CD68                               | FA-11     | FITC         | BIO-Rad MCA1957FT          | FCM                               | 1 µg/2x10 <sup>6</sup> cells |
| Rat anti-mouse CD206                              | MR5D3     | PE           | BIO-Rad MCA2235PET         | FCM                               | 1µg/2x10 <sup>6</sup> cells  |
| Rat anti-mouse IL-10                              | JES5-16E3 | PerCP /Cy5.5 | BioLegend 505027           | FCM                               | 1 µg/2x10 <sup>6</sup> cells |
| Rat anti-mouse IL-12/ IL-23p40                    | C15.6     | APC          | BioLegend 505205           | FCM                               | 1 µg/2x10 <sup>6</sup> cells |
| Rat IgG1,κ Isotype Ctrl                           | RTK2071   | APC          | BioLegend 400411           | FCM                               | 1 µg/2x10 <sup>6</sup> cells |
| Rat IgG2b,κ Isotype Ctrl                          | RTK4530   | APC          | BioLegend 400611           | FCM                               | 1 µg/2x10 <sup>6</sup> cells |
| Rat IgG2b, κ Isotype Ctrl                         | RTK4530   | PerCP /Cy5.5 | BioLegend 400631           | FCM                               | 1 µg/2x10 <sup>6</sup> cells |
| Armenian Hamster IgG Isotype Ctrl                 | HTK888    | PE           | BioLegend 400907           | FCM                               | 1 µg/2x10 <sup>6</sup> cells |
| Rat IgG2b, κ Isotype Ctrl                         | RTK4530   | PE           | BioLegend 400607           | FCM                               | 1 µg/2x10 <sup>6</sup> cells |
| Rat IgG2a, κ Isotype Ctrl                         | RTK2758   | FITC         | BioLegend 400505           | FCM                               | 1 µg/2x10 <sup>6</sup> cells |

IHC; immunohistochemistry, IF; immunofluorescence, FCM; flow cytometry



**Supplementary Table 3. Primers used for PCR and real-time PCR.**

| Primer name | Sequences (5' to 3')     | Accession No.                          | Application         |
|-------------|--------------------------|----------------------------------------|---------------------|
| moST2L-F    | GCATGATAAGGCACACCATAA    | NM_001025602                           | PCR, qPCR           |
| moST2L-R    | ATCGTAGAGCTTGCCATCGT     |                                        |                     |
| mosST2-F    | GCATGATAAGGCACACCATAA    | NM_010743                              | PCR, qPCR           |
| mosST2-R    | ACACAGAGAGGGGAAGGATA     |                                        |                     |
| moIl1rap-F  | TCCTCTGGCCTTACCCTGATCT   | NM_134103                              | PCR                 |
| moIl1rap-R  | AACCCTTATACCAAGTGACCG    |                                        |                     |
| moMyd88-F   | GTGGTGGTTGTTTCTGACGA     | NM_010851                              | PCR                 |
| moMyd88-R   | AGGGTCATCTTCAGGGCAG      |                                        |                     |
| moIl33-F1   | GGAAGAAGGTGATGGTGAAC     | NM_133775                              | PCR                 |
| moIl33-R1   | CCACAACATCGTAAGCCAAG     |                                        |                     |
| moIl33-F2   | GGAAAAGACCAAGAGCAAGACC   | NM_001164724                           | qPCR                |
| moIl33-R2   | TTCTTCCCATCCACACCGTC     |                                        |                     |
| huST2L-F    | GAAGGCACACCGTAAGACTA     | NM_016232                              | PCR, qPCR           |
| huST2L-R    | TTGTAGTTCCGTGGGTAGAC     |                                        |                     |
| husST2-F    | GAAGGCACACCGTAAGACTA     | NM_003856                              | PCR, qPCR           |
| husST2-R    | GACAAACCAACGATAGGAGG     |                                        |                     |
| huIL1RAP-F  | CACTTCTGTGGTGTGTAGTGA    | NM_002182                              | PCR                 |
| huIL1RAP-R  | AATGCAACTTTGCTG CAATAT   |                                        |                     |
| huMYD88-F   | AAAGAGGTTGGCTAGAAGGC     | NM_001172567                           | PCR                 |
| huMYD88-R   | CAAGGCGAGTCCAGAACCA      |                                        |                     |
| huIL33-F1   | GTGACGGTGTGATGGTAAG      | NM_033439                              | PCR                 |
| huIL33-R1   | CCAAGACTCACAGGTTTCCA     |                                        |                     |
| huIL33-F2   | CTGCCTGTCAACAGCAGTCT     | NM_001164724                           | qPCR                |
| huIL33-R2   | CTGGTCTGGCAGTGGTTTTT     |                                        |                     |
| GAPDH-F     | ACCACAGTCCATGCCATCAC     | NM_001256799 (hu)<br>NM_001289726 (mo) | PCR                 |
| GAPDH-R     | TCCACCACCCTGTTGCTGTA     |                                        |                     |
| moGapdh-F   | TGCACCACCAACRGCTTAG      | NM_008084                              | qPCR                |
| moGapdh-R   | GGATGCAGGGATGATGTTC      |                                        |                     |
| huGAPDH-F   | CGCTCTCTGCTCCTCCTGTT     | NM_002046                              | qPCR                |
| huGAPDH-R   | CCATGGTGTCTGAGCGATGT     |                                        |                     |
| moIfng-F    | GGCCATCAGCAACAACATAAGCGT | NM_008337                              | qPCR                |
| moIfng-R    | TGGGTTGTTGACCTCAAACCTGGC |                                        |                     |
| moIl4-F     | AGATGGATGTGCCAAACGTCCTCA | NM_021283                              | qPCR                |
| moIl4-R     | AATATGCGAAGCACCTTGAAGCC  |                                        |                     |
| moIl13-F    | ACAAGACCAGACTCCCCTGT     | NM_008355                              | qPCR                |
| moIl13-R    | TCTGGGTCTCTGTAGATGGCA    |                                        |                     |
| moCcl7-F    | GATCTCTGCCACGCTTCTGT     | NM_013654                              | qPCR                |
| moCcl7-R    | ATAGCCTCCTCGACCCACTT     |                                        |                     |
| Alu-F       | CACCTGTAATCCCAGCACTTT    | -                                      | <i>Alu</i> analysis |
| Alu-R       | CCCAGGCTGGAGTGCAGT       |                                        |                     |
| moGapdh-F   | GCACAGTCAAGGCCGAGAAT     |                                        |                     |
| moGapdh-R   | GCCTTCTCCATGGTGGTGAA     |                                        |                     |

hu: human, mo: mouse
